# Supplementary material
Source: PubMed Central journal article supplement (PMC7661345)
Supplement: 41581_2020_356_MOESM1_ESM.pdf [file 41581_2020_356_MOESM1_ESM.pdf]

---

**Supplementary information**

---

**COVID-19-associated acute kidney injury:  
consensus report of the 25th Acute Disease  
Quality Initiative (ADQI) Workgroup**

---

In the format provided by the  
authors and unedited

## **Supplementary Box 1 | 25th ADQI workgroup co-chairs and members**

### **Group 1: Epidemiology and diagnosis**

- Co-chairs: Alexander Zarbock (Germany), Ravindra L. Mehta (USA)
- Members: Michael J. Germain (USA), Shruti Gupta (USA), Eric Hoste (Belgium), Sumit Mohan (USA), Li Yang (China)

### **Group 2: Pathophysiology and effects of treatment**

- Co-chairs: Kathleen D. Liu (USA), Lui G. Forni (UK)
- Members: Samira Bell (UK), Vincenzo Cantaluppi (Italy), Michael Joannidis (Austria), Jay L. Koyner (USA), Matthieu Legrand (USA)

### **Group 3: Prevention and management of AKI**

- Co-chairs: Marlies Ostermann (UK), John A. Kellum (USA)
- Members: Azra Bihorac (USA), Stuart L. Goldstein (USA), Kianoush Kashani (USA), Zhiyong Peng (China), Nattachai Srisawat (Thailand)

### **Group 4: Renal replacement therapy**

- Co-chairs: Michael J. Connor, Jr. (USA), Mitra K. Nadim (USA)
- Members: Neesh Pannu (Canada), Xose L. Perez-Fernandez (Spain), Peter Pickkers (Netherlands), John Prowle (UK), Anitha Vijayan (USA)

### **Group 5: Extracorporeal blood purification**

- Co-chairs: Thomas Rimmelé (France), Claudio Ronco (Italy)
- Members: Faeq Husain-Syed (Germany), Nuttha Lumlertgul (Thailand), Thiago Reis (Brazil), Ashita Tolwani (USA), Gianluca Villa (Italy)

**Supplementary Table 1 | Pharmacokinetics, recommended dosage, and potential effects on the kidney of currently proposed COVID-19 drugs.**

| Drugs                            | Action                                      | MW        | Protein binding | Metabolism and drug–drug interaction               | Excretion                                                                                                                                                                                               | Route | Dosing in normal GFR                                      | Dosing in reduced GFR                                 | Dosing in RRT                                                               | Potential effects on kidney                                                                                                                                |
|----------------------------------|---------------------------------------------|-----------|-----------------|----------------------------------------------------|---------------------------------------------------------------------------------------------------------------------------------------------------------------------------------------------------------|-------|-----------------------------------------------------------|-------------------------------------------------------|-----------------------------------------------------------------------------|------------------------------------------------------------------------------------------------------------------------------------------------------------|
| <b>Antiviral drugs</b>           |                                             |           |                 |                                                    |                                                                                                                                                                                                         |       |                                                           |                                                       |                                                                             |                                                                                                                                                            |
| Remdesivir                       | Adenosine analogue, which inhibits RdRp     | 602.2 Da  | 88%             | Intracellular CYP3A4 inhibitor                     | <ul style="list-style-type: none"> <li>Renal excretion of excipient sulfobutylether-<math>\beta</math>-cyclodextrin sodium salt (SBECD)</li> <li>74% renal excretion of metabolite GS-441524</li> </ul> | IV    | 200mg (day 1) then 100mg qd (5-10 days)                   | Not recommended if GFR < 30 ml/min/1.73m <sup>2</sup> | NR                                                                          | <ul style="list-style-type: none"> <li>Potential accumulation of the excipient SBECD</li> <li>Evidence of kidney damage in animal studies (FDA)</li> </ul> |
| Favipiravir                      | Purine analogue, which inhibits RdRp        | 157.1 Da  | 54%             | Liver                                              | Mainly renal excretion of inactive metabolite T-705M1s                                                                                                                                                  | Oral  | 1,600mg bd (day 1), then 600mg qd (day 2-5)               | Not recommended if GFR < 20 ml/min/1.73m <sup>2</sup> | NR                                                                          | Not reported                                                                                                                                               |
| Umifenovir (arbidol)             | Inhibitor of spike protein/ACE2 interaction | 477.4 Da  | N/A             | Liver and intestine by CYP3A4                      | Faeces                                                                                                                                                                                                  | Oral  | 200mg tid up to 21 days                                   | No dose adjustment                                    | N/A                                                                         | Not reported                                                                                                                                               |
| Lopinavir / ritonavir            | Protease inhibitors                         | 1349.7 Da | 98-99%          | Liver<br>Ritonavir: CYP3A4 inhibitor and substrate | Mainly faeces<br>2% urine                                                                                                                                                                               | Oral  | 400/100mg bd                                              | No dose adjustment                                    | No dose adjustment                                                          | Case reports of AKI                                                                                                                                        |
| Camostat mesylate                | Serine protease inhibitor                   | 494.5 Da  | 25.8-28.2%      | Hydrolysis by carboxyesterase                      | 89.8-95.6% urine                                                                                                                                                                                        | Oral  | 200mg tid                                                 | N/A                                                   | N/A                                                                         | Not reported                                                                                                                                               |
| <b>Anti-malaria drug</b>         |                                             |           |                 |                                                    |                                                                                                                                                                                                         |       |                                                           |                                                       |                                                                             |                                                                                                                                                            |
| Hydroxychloroquine / Chloroquine | Viral entry and endocytosis inhibitor       | 335.9 Da  | 50%             | Liver by CYP3A4                                    | 50% urine (16-21% as unchanged drug)                                                                                                                                                                    | Oral  | HCQ: 400-600mg bd (day 1) then 200mg bd (for up to day 5) | No dose adjustment, prescribe with caution            | Chloroquine: HD = 50% dose reduction; CRRT = full dose; Hydroxychloroquine: | Renal lipidosis mimicking Fabry disease presenting with proteinuria                                                                                        |

|                                            |                                            |           |     |                              |                                      |          |                                                   |                                                                   |                                        |                |
|--------------------------------------------|--------------------------------------------|-----------|-----|------------------------------|--------------------------------------|----------|---------------------------------------------------|-------------------------------------------------------------------|----------------------------------------|----------------|
|                                            |                                            |           |     |                              |                                      |          |                                                   |                                                                   | HD, CRRT =<br>N/A, use with<br>caution |                |
| <b>Anti-parasitic drug</b>                 |                                            |           |     |                              |                                      |          |                                                   |                                                                   |                                        |                |
| Ivermectin                                 | Viral protein<br>cargos inhibitor          | 1735.2 Da | 93% | liver                        | feces                                | Oral     | 12mg single<br>dose                               | No dose<br>adjustment                                             | N/A                                    | Not reported   |
| Anti-inflammatory / immunomodulatory drugs |                                            |           |     |                              |                                      |          |                                                   |                                                                   |                                        |                |
| Colchicine                                 | Lipid soluble<br>alkaloid                  | 399.4 Da  | 39% | Liver by CYP3A4<br>and P-gp1 | Mainly hepatobiliary<br>10-20% urine | Oral     | 0.5mg bd                                          | Reduce dose<br>by 50% in GFR<br>< 50<br>ml/min/1.73m <sup>2</sup> | 0.3mg qd                               | Rhabdomyolysis |
| Tocilizumab                                | Recombinant IL-6<br>monoclonal<br>antibody | 148 kDa   | N/A | Proteolysis                  | Not via renal or<br>hepatic pathways | IV       | 8mg/kg (up to<br>800mg) 1-2<br>doses              | No dose<br>adjustment                                             | N/A                                    | Not reported   |
| Sarilumab                                  | Recombinant IL-6<br>monoclonal<br>antibody | 150 kDa   | N/A | Proteolysis                  | Not via renal or<br>hepatic pathways | SC       | 200mg<br>single dose                              | No dose<br>adjustment                                             | N/A                                    | Not reported   |
| Anakinra                                   | IL-1 receptor<br>antagonist                | 17.3 kDa  | N/A | N/A                          | 80% urine                            | IV or SC | 5mg/kg (IV) or<br>200 mg bd (sc)                  | Reduce dose<br>by 50% or<br>alternate day                         | N/A                                    | Not reported   |
| Emapalumab                                 | IFN-γ blocking<br>antibody                 | 154.4 kDa | N/A | Proteolysis                  | Not via renal or<br>hepatic pathways | IV       | Day 1: 6mg/kg.<br>Days 4, 7, 10<br>and 13: 3mg/kg | No dose<br>adjustment                                             | No dose<br>adjustment                  | Not reported   |
| Interferon                                 | Recombinant<br>interferon                  | 20 kDa    | N/A | N/A                          | N/A                                  | SC       | (IFN-beta 1b)<br>8mU alternate<br>days (14 days)  | No dose<br>adjustment,<br>prescribe with<br>caution               | Use with<br>caution                    | Renal TMA      |
| Canakinumab                                | Human anti-IL-1β<br>monoclonal<br>antibody | 145.2 kDa | N/A | N/A                          | N/A                                  | IV       | 450 - 700mg<br>single dose                        | N/A                                                               | N/A                                    | Not reported   |

|             |                                                     |          |     |                           |                                   |      |                     |                                                                                                                  |                      |                                               |
|-------------|-----------------------------------------------------|----------|-----|---------------------------|-----------------------------------|------|---------------------|------------------------------------------------------------------------------------------------------------------|----------------------|-----------------------------------------------|
| Bevacizumab | Anti-VEGF recombinant humanized monoclonal antibody | 149 kDa  | N/A | Proteolysis               | Not via renal or hepatic pathways | IV   | 7.5mg/kg            | No dose adjustment                                                                                               | No dose adjustment   | Proteinuria; renal TMA                        |
| Ruxolitinib | Selective JAK1 and JAK2 inhibitor                   | 306.4 Da | 97% | Liver by CYP3A4 substrate | 74% urine<br>22% faeces           | Oral | 5mg bd (14-28 days) | Reduce dose by 50% or avoid if GFR < 59 mL/min/1.73m <sup>2</sup>                                                | 15-20mg once post HD | Not reported                                  |
| Baricitinib | Selective JAK1 and JAK2 inhibitor                   | 371.4 Da | 50% | Liver CYP3A4 substrate    | 69% urine<br>15% faeces           | Oral | 2mg qds (10 days)   | If GFR 30-60 ml/min/1.73m <sup>2</sup> : reduce to 1mg qd; not recommended if GFR < 30 ml/min/1.73m <sup>2</sup> | N/A                  | Reduce proteinuria in diabetic kidney disease |

AKI, acute kidney injury; GFR, glomerular filtration rate; HCQ, hydroxychloroquine; HD, haemodialysis; IFN $\gamma$ , interferon gamma; IL, interleukin; IV, intravenous; JAK; janus kinase; kDa; kilodalton; MW, molecular weight; N/A, not available; NR: not recommended; P-gp1, P-glycoprotein1; RdRp, RNA-dependent RNA polymerase enzyme; RNA, ribonucleic acid; RRT; renal replacement therapy; SC, subcutaneous; TMA; thrombotic microangiopathy; VEGF, vascular endothelial growth factor.

**Supplementary Table 2 | Composition, use and prescription of extracorporeal blood purification using cartridges and RRT membranes.**

| <b>Technique and associated considerations</b> | <b>Hyperinflammation</b>       | <b>Gram-negative sepsis; endotoxaemia</b>               | <b>AKI</b>                                                        | <b>AKI; increased myoglobin levels; hyperinflammation</b>                               | <b>AKI; hyperinflammation; Gram-negative sepsis; endotoxaemia</b>                       |
|------------------------------------------------|--------------------------------|---------------------------------------------------------|-------------------------------------------------------------------|-----------------------------------------------------------------------------------------|-----------------------------------------------------------------------------------------|
| Technique                                      | Haemoperfusion                 | Haemoperfusion                                          | Haemodialysis, haemofiltration or haemodiafiltration              | Haemodialysis (CVVHD for MCO or HCO), haemofiltration or haemodiafiltration             | Haemodialysis, haemofiltration or haemodiafiltration                                    |
| Membrane composition                           | Porous polymer beads; sorbents | PMX covalently bound to polypropylene–polystyrene fibre | AN69; PMMA; polysulfone                                           | AN69-ST; MCO; HCO                                                                       | AN69-PEI concentrated; PMMA                                                             |
| Target                                         | Cytokines                      | Endotoxin                                               | Uraemic toxins; excess fluid; electrolyte and acid–base disorders | Uraemic toxins; excess fluid; electrolyte and acid–base disorders; myoglobin; cytokines | Uraemic toxins; excess fluid; electrolyte and acid–base disorders; cytokines; endotoxin |
| Mechanism of removal                           | Adsorption                     | Adsorption                                              | Filtration (convection and diffusion)                             | Adsorption (cytokines); filtration (convection and diffusion)                           | Adsorption (cytokines and endotoxin); filtration (convection and diffusion)             |
| Duration                                       | 2–24h                          | 2h                                                      | Up to 72h (with the same disposable)                              | Up to 72h (with the same disposable)                                                    | Up to 24h (with the same disposable)                                                    |
| Frequency                                      | 1–3 days                       | 2 days                                                  | Variable                                                          | Variable                                                                                | 1–3 days                                                                                |
| Anticoagulation                                | Citrate or heparin             | Citrate or heparin                                      | Citrate or heparin                                                | Citrate or heparin                                                                      | Citrate or heparin                                                                      |
| Blood flow                                     | 100–500 ml/min                 | 80–120 ml/min                                           | 150–250 ml/min                                                    | 150–250 ml/min; 80–200 ml/min for MCO or HCO                                            | 150–250 ml/min                                                                          |

AKI, acute kidney injury; AN, acrylonitrile; COVID-19, coronavirus disease 2019; CRRT, continuous renal replacement therapy; CVVHD, continuous veno-venous haemodialysis; HCO, high cut-off; HP, hemoperfusion; MCO, medium cut-off; PEI, polyethyleneimine; PMMA, polymethylmethacrylate; PMX, polymyxin B; RRT, renal replacement therapy; SARS-CoV-2, severe acute respiratory syndrome coronavirus 2; ST, surface-treated. Adapted with permission from the Acute Disease Quality Initiative 25, [www.ADQI.org](http://www.ADQI.org).
